# Supplementary material
Source: ML conference proceedings conference paper supplement (https://proceedings.neurips.cc/paper_files/paper/2019/hash/e449b9317dad920c0dd5ad0a2a2d5e49-Abstract.html)
Supplement: Supplementary file [file e449b9317dad920c0dd5ad0a2a2d5e49-Supplemental.zip]

---

## $\epsilon$ -Best-Arm Identification in Pay-Per-Reward Multi-Armed Bandits Supplementary Material

---

### A A bound on $V$

We show that if each arm is positively correlated with at most  $Q$  other arms, then  $V$  in Assumption 2.2 can be set to  $1 + 2Q$ . For a set of arms  $A \subseteq [K]$  and  $i \in A$ , let  $P(i)$  denote the set of arms in  $A$  that are different from  $i$  and positively correlated with it. Assume w.l.o.g. that  $j < i \Rightarrow w_j \leq w_i$ . Then, using Assumption 2.1,

$$\begin{aligned}
 \sigma_A^2 &= \sum_{i \in A} \sigma_i^2 + \sum_{i, j \in A, i \neq j} \text{Cov}(X_i, X_j) \\
 &\leq W_A + \sum_{i, j \in A, i \neq j} \mathbb{I}[j \in P(i)] \sqrt{\sigma_i^2 \sigma_j^2} \\
 &\leq W_A + 2 \sum_{i \in A} \sum_{j \in A, j < i} \mathbb{I}[j \in P(i)] \sqrt{w_i w_j} \\
 &\leq W_A + 2 \sum_{i \in A} \sum_{j \in A, j < i} \mathbb{I}[j \in P(i)] w_i \\
 &= W_A + 2 \sum_{i \in A} w_i \sum_{j \in A, j < i} \mathbb{I}[j \in P(i)] \\
 &\leq W_A + 2 \sum_{i \in A} w_i Q \\
 &\leq (1 + 2Q) W_A.
 \end{aligned}$$

Thus, in this case Assumption 2.2 holds with  $V = 1 + 2Q$ .

### B Median-of-means estimation

In Section 2, we defined the median-of-means as the median of empirical means of several batches of i.i.d. samples. More generally, one can consider the  $(q, \ell)$ - $p$ -of-means estimate, for  $p \in (0, 1)$ , in which instead of the median, the estimator is set to a number such that a  $p$  fraction of the  $q$  empirical means are no larger than it and  $1 - p$  fraction are no smaller than it. The  $(q, \ell)$ -MoM estimate is thus also the  $(q, \ell)^{-\frac{1}{2}}$ -of-means estimate. Lemma B.1 and its proof are similar to those provided in [2, 16], and are brought here for completeness. Lemma 2.3 is obtained from Lemma B.1 by setting  $p = \frac{1}{2}$  and  $a = 6$ . Lemma B.1 is used also in the proof of Lemma 5.7 in Appendix C.

**Lemma B.1** (Median-of-Means). *Let  $p \in (0, \frac{1}{2})$ . Let  $X$  be a random variable with mean  $w$  and variance  $\sigma^2 < \infty$ . Let  $q, \ell$  be integers, and let  $\hat{w}$  be the  $(q, \ell)$ - $p$ -of-means estimate of  $w$  from a sample of  $q\ell$  i.i.d. draws of copies of  $X$ . Let  $a > 1/p$ . With a probability at least  $1 - \exp(-q \cdot 2(p - 1/a)^2)$ ,  $|w - \hat{w}| \leq \sqrt{a\sigma^2/\ell}$ .*

*Proof.* For  $j \in [q]$ , let  $\hat{w}^j$  be the  $j$ 'th empirical mean used for the estimator. By Chebychev's inequality,  $\mathbb{P}[|w - \hat{w}^j| \leq \sqrt{a\sigma^2/\ell}] \geq 1 - 1/a$ . For  $j \in [q]$ , let  $b_j = \mathbb{I}[|w - \hat{w}^j| \leq \sqrt{a\sigma^2/\ell}]$ . Then  $\mathbb{E}[b_j] \geq 1 - 1/a$ , and  $b_1, \dots, b_q$  are independent random variables. By Hoeffding's inequality,

$$\mathbb{P}\left[\frac{1}{q} \sum_{i=1}^q b_i > (1 - p)\right] \geq \mathbb{P}\left[\left(\mathbb{E}[b_i] - \frac{1}{q} \sum_{i=1}^q b_i\right) < p - 1/a\right] \geq 1 - \exp(-q \cdot 2(p - 1/a)^2).$$

If  $\frac{1}{q} \sum_{i=1}^q b_i > 1 - p$  then more than  $1 - p$  fraction of the empirical means satisfy  $|w - \hat{w}^j| \leq \sqrt{a\sigma^2/\ell}$ . We now show that this holds also for  $w$  which is the  $p$ -of-means estimate. Assume for contradiction that it does not hold for  $w$ . If  $w \leq \hat{w}$ , it follows that all the  $p$ -fraction smaller estimates also do not

satisfy the inequality, which is a contradiction. If  $w \geq \hat{w}$  and does not satisfy the inequality, then  $w$  is larger than at least  $1 - p$  fraction of the estimates. But this would imply  $p \geq 1 - p$ , which is impossible since  $p \leq \frac{1}{2}$ . Thus, the  $p$ -of-means satisfies the inequality, which concludes the proof.  $\square$

## C Proof of Lemma 5.7

*Proof of Lemma 5.7.* For  $i \in [z]$ , let  $\{Y_i^{j,l}\}_{j \in [q], l \in [\ell]}$  be the set of i.i.d. samples of copies of  $Y_i$  used to get the MoM estimate  $\hat{\mu}_i$ . Denote  $\hat{\mu}_i^j := \frac{1}{\ell} \sum_{l=1}^{\ell} Y_i^{j,l}$ , so that  $\hat{\mu}_i$  is the median of  $\{\hat{\mu}_i^j\}_{j \in [q]}$ . Let  $\bar{Y}^{j,l} = \sum_{i \in [z]} Y_i^{j,l}$ . Then  $\{\bar{Y}^{j,l}\}_{j \in [q], l \in [\ell]}$  is a set of i.i.d. samples of copies of  $\bar{Y}$ . Let  $\hat{\mu}$  be the  $(q, \ell)$ -1/3-of-means estimate of  $\bar{\mu} = \mathbb{E}[\bar{Y}]$  based on these samples. Each mean in this estimator is equal to  $\frac{1}{\ell} \sum_{l \in [\ell]} \bar{Y}^{j,l} = \sum_{i \in [z]} \hat{\mu}_i^j$  for some  $j \in [q]$ . Then  $\hat{\mu}$  is at least as large as a 1/3 of the numbers in the set  $\{\sum_{i \in [z]} \hat{\mu}_i^j\}_{j \in [q]}$ .

By Lemma B.1 with  $p = 1/3$  and  $a = 6$ , with a probability at least  $1 - \exp(-q \cdot 2(1/3 - 1/6)^2) = 1 - \exp(-q/18)$ ,

$$\hat{\mu} \leq \mu + \sqrt{6\sigma^2/\ell}. \quad (5)$$

Now, let  $I := \{i \in [z] \mid \hat{\mu}_i \geq \gamma\mu\}$ , and  $T := |I|$ . We have  $\forall i \in I, \sum_{j \in [q]} \mathbb{I}[\hat{\mu}_i^j \geq \gamma\mu] \geq q/2$ . Hence,

$$\frac{1}{q} \sum_{j \in [q]} \sum_{i \in I} \mathbb{I}[\hat{\mu}_i^j \geq \gamma\mu] \geq T/2.$$

Let  $N_j := \sum_{i \in I} \mathbb{I}[\hat{\mu}_i^j \geq \gamma\mu] \leq T$ . Letting  $J$  be an integer random variable drawn uniformly from  $[q]$ , we conclude that  $\mathbb{E}[N_J] \geq T/2$ , so  $\mathbb{E}[T - N_J] < T/2$ . By Markov's inequality,

$$\mathbb{P}[T - N_J \geq 3T/4] < (T/2)/(3T/4) = 2/3,$$

so  $\mathbb{P}[N_J > T/4] \geq 1/3$ . It follows that for at least a third of the indices  $j \in [q]$ ,  $\{\hat{\mu}_i^j\}_{i \in [z]}$  includes at least  $T/4$  values larger than  $\gamma\mu$ , hence for these indices,  $\sum_{i \in [z]} \hat{\mu}_i^j \geq T\gamma\mu/4$ . Therefore  $\hat{\mu} \geq T\gamma\mu/4$ . Combined with Eq. (5), we have that with a probability at least  $1 - \exp(-q/18)$ ,

$$T\gamma\mu/4 \leq \hat{\mu} \leq \mu + \sqrt{6\sigma^2/\ell}.$$

Therefore,  $T \leq \frac{4}{\gamma} (1 + \sqrt{\frac{6\sigma^2}{\mu^2\ell}})$ , which concludes the proof.  $\square$
